# Supplementary material for: Ballistic transport in sub-10 nm monolayer InAs transistors for high-performance applications
Source: Royal Society of Chemistry journal article supplement (doi:10.1039/d4cp03789h), 2024-01-01
Supplement: d4cp03789h1.pdf [file d4cp03789h1.pdf]

## Supplementary Material

### **Ballistic transport in sub-10 nm monolayer InAs transistors for high-performance applications**

Tianruo Xie<sup>1</sup>, Yuliang Mao<sup>1,2†</sup>

<sup>1</sup>School of Physics and Optoelectronics, Xiangtan University, Hunan 411105, China

<sup>2</sup>Hunan National Applied Mathematics Center, Xiangtan University, Xiangtan 411105, China

---

†Corresponding author, E-mail address: ylmao@xtu.edu.cn

**Table S1.** Summary of ballistic transport performance of optimized n/p-type ML InAsH<sub>2</sub> MOSFETs with sub-10 nm gate length against ITRS 2013 requirements for HP device when n-MOSFETs are under the doping concentration of  $1.5 \times 10^{13} \text{ cm}^{-2}$ , and p-MOSFETs are under the doping concentration of  $6.0 \times 10^{13} \text{ cm}^{-2}$ .

|              | <b>L<sub>g</sub></b><br>(nm) | <b>EOT</b><br>(nm) | <b>V<sub>dd</sub></b><br>(V) | <b>UL</b><br>(nm) | <b>SS</b><br>(mV/dec) | <b>I<sub>off</sub></b><br>( $\mu\text{A}/\mu\text{m}$ ) | <b>I<sub>on</sub></b><br>( $\mu\text{A}/\mu\text{m}$ ) | <b>I<sub>on</sub>/I<sub>off</sub></b> | <b><math>\tau</math>(ps)</b> | <b>PDP</b><br>(fJ/ $\mu\text{m}$ ) |
|--------------|------------------------------|--------------------|------------------------------|-------------------|-----------------------|---------------------------------------------------------|--------------------------------------------------------|---------------------------------------|------------------------------|------------------------------------|
| n-type       | 4.0                          | 0.41               | 0.64                         | 0                 | 261                   | 0.1                                                     | —                                                      | —                                     | —                            | —                                  |
|              |                              |                    |                              | 1                 | 200.7                 |                                                         | —                                                      | —                                     | —                            | —                                  |
|              |                              |                    |                              | 2                 | 176.2                 |                                                         | 26.5                                                   | $2.6 \times 10^2$                     | 81.7                         | 0.046                              |
|              |                              |                    |                              | 3                 | 140                   |                                                         | 847.7                                                  | $8.5 \times 10^3$                     | 0.249                        | 0.045                              |
|              |                              |                    |                              | 4                 | 132.7                 |                                                         | 1064.9                                                 | $1.1 \times 10^4$                     | 0.328                        | 0.097                              |
|              | 5.0                          | 0.41               | 0.64                         | 0                 | 185.8                 | 0.1                                                     | 7.1                                                    | 71                                    | 36.3                         | 0.055                              |
|              |                              |                    |                              | 1                 | 162.4                 |                                                         | 107.5                                                  | $1.1 \times 10^3$                     | 2.554                        | 0.059                              |
|              |                              |                    |                              | 2                 | 134.9                 |                                                         | 1230                                                   | $1.2 \times 10^4$                     | 0.247                        | 0.065                              |
|              |                              |                    |                              | 3                 | 123.2                 |                                                         | 1327.5                                                 | $1.3 \times 10^4$                     | 0.205                        | 0.056                              |
|              |                              |                    |                              | 4                 | 107.7                 |                                                         | 1741.8                                                 | $1.7 \times 10^4$                     | 0.126                        | 0.053                              |
| p-type       | 4.0                          | 0.41               | 0.64                         | 0                 | 367                   | 0.1                                                     | —                                                      | —                                     | —                            | —                                  |
|              |                              |                    |                              | 1                 | 252                   |                                                         | —                                                      | —                                     | —                            | —                                  |
|              |                              |                    |                              | 2                 | 205.4                 |                                                         | 268.5                                                  | $2.6 \times 10^3$                     | 1.060                        | 0.061                              |
|              |                              |                    |                              | 3                 | 155.6                 |                                                         | 445                                                    | $4.4 \times 10^3$                     | 0.504                        | 0.030                              |
|              |                              |                    |                              | 4                 | 143                   |                                                         | —                                                      | —                                     | —                            | —                                  |
|              | 5.0                          | 0.41               | 0.64                         | 0                 | 241                   | 0.1                                                     | —                                                      | —                                     | —                            | —                                  |
|              |                              |                    |                              | 1                 | 194                   |                                                         | 17.7                                                   | $1.7 \times 10^2$                     | 12.15                        | 0.046                              |
|              |                              |                    |                              | 2                 | 146                   |                                                         | 502                                                    | $5.0 \times 10^3$                     | 0.968                        | 0.103                              |
|              |                              |                    |                              | 3                 | 129                   |                                                         | 862                                                    | $8.6 \times 10^3$                     | 0.426                        | 0.078                              |
|              |                              |                    |                              | 4                 | 110                   |                                                         | 1011                                                   | $1.0 \times 10^4$                     | 0.345                        | 0.074                              |
| ITRS HP 2028 | 5.1                          | 0.41               | 0.64                         | —                 | —                     | 0.1                                                     | 900                                                    | —                                     | 0.423                        | 0.243                              |
| n            | 7.5                          | 0.49               | 0.69                         | —                 | 112                   | 0.1                                                     | 2405.5                                                 | $2.4 \times 10^4$                     | 0.237                        | 0.131                              |
| p            | 7.5                          | 0.49               | 0.69                         | —                 | 121                   | 0.1                                                     | 1124.4                                                 | $1.1 \times 10^4$                     | 0.457                        | 0.118                              |
| ITRS HP 2024 | 7.3                          | 0.49               | 0.68                         | —                 | —                     | 0.1                                                     | 1170                                                   | —                                     | 0.451                        | 0.364                              |
| n            | 8.8                          | 0.54               | 0.72                         | —                 | 86.1                  | 0.1                                                     | 2660                                                   | $2.6 \times 10^4$                     | 0.264                        | 0.168                              |
| p            | 8.8                          | 0.54               | 0.72                         | —                 | 100                   | 0.1                                                     | 2158                                                   | $2.1 \times 10^4$                     | 0.456                        | 0.236                              |
| ITRS HP 2022 | 8.8                          | 0.54               | 0.72                         | —                 | —                     | 0.1                                                     | 1330                                                   | —                                     | 0.463                        | 0.45                               |
| n            | 10.1                         | 0.56               | 0.74                         | —                 | 75.9                  | 0.1                                                     | 2783                                                   | $2.7 \times 10^4$                     | 0.330                        | 0.221                              |
| p            | 10.1                         | 0.56               | 0.74                         | —                 | 73.1                  | 0.1                                                     | 2619                                                   | $2.6 \times 10^4$                     | 0.343                        | 0.229                              |
| ITRS HP 2022 | 10.1                         | 0.56               | 0.74                         | —                 | —                     | 0.1                                                     | 1450                                                   | —                                     | 0.477                        | 0.51                               |

**Table S2.** Subthreshold swing  $SS$  and on-state current  $I_{on}$  of the  $n$ - and  $p$ -type DG ML InAsH<sub>2</sub> MOSFETs with the gate length  $L_g = 5$  nm and  $UL = 2$  nm under different doping concentrations against ITRS HP 2028 requirements.

| $L_g$ (nm)          | $UL$ (nm) |        | doping (cm <sup>-2</sup> ) | $SS$ (mV/dec) | $I_{on}$ ( $\mu A/\mu m$ ) |
|---------------------|-----------|--------|----------------------------|---------------|----------------------------|
| 5                   | 2         | n-type | $9 \times 10^{12}$         | 144           | 902                        |
|                     |           |        | $1.5 \times 10^{13}$       | 135           | 1230                       |
|                     |           |        | $2.4 \times 10^{13}$       | 130           | 762                        |
|                     |           | p-type | $4.5 \times 10^{13}$       | 141           | 492                        |
|                     |           |        | $6.0 \times 10^{13}$       | 146           | 502                        |
|                     |           |        | $7.5 \times 10^{13}$       | 156           | 274                        |
| <b>ITRS HP 2028</b> |           | -      |                            |               | 900                        |

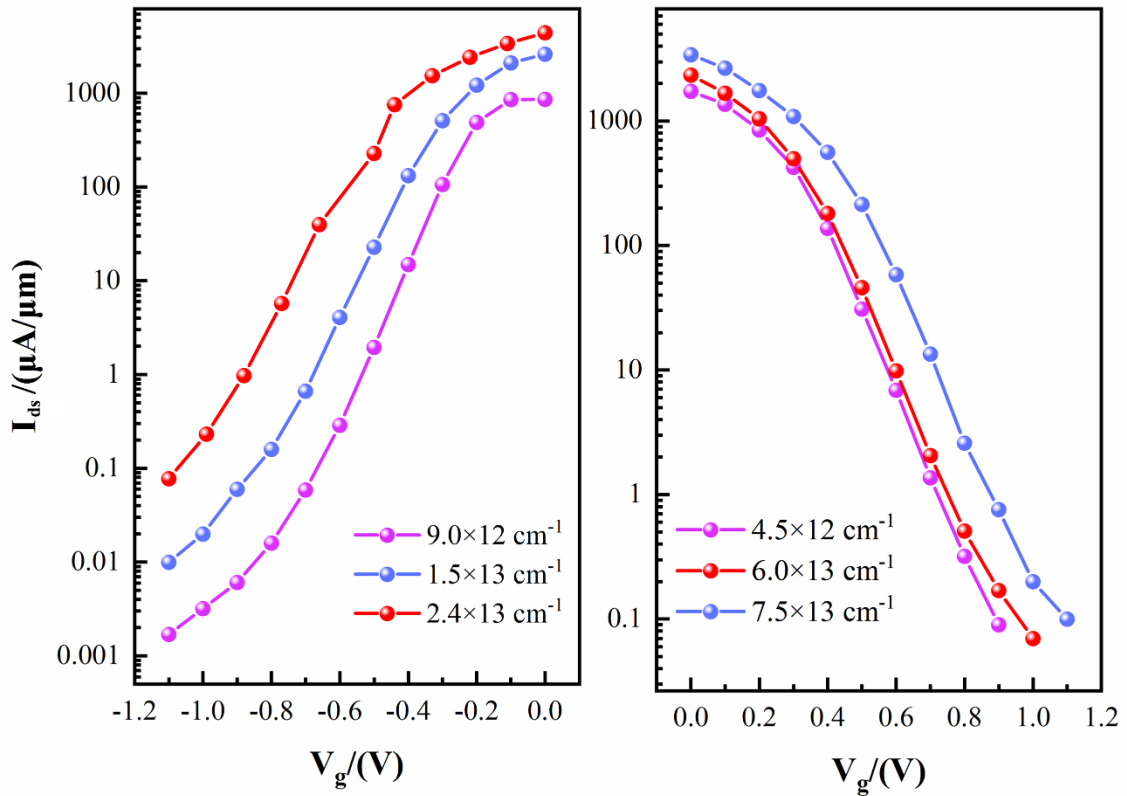

**Figure S1.**  $I$ - $V_g$  characteristics of the  $n$ - and  $p$ -type DG ML InAsH<sub>2</sub> MOSFETs with  $L_g = 5$  nm and  $UL = 2$  nm with different electrode doping concentrations.

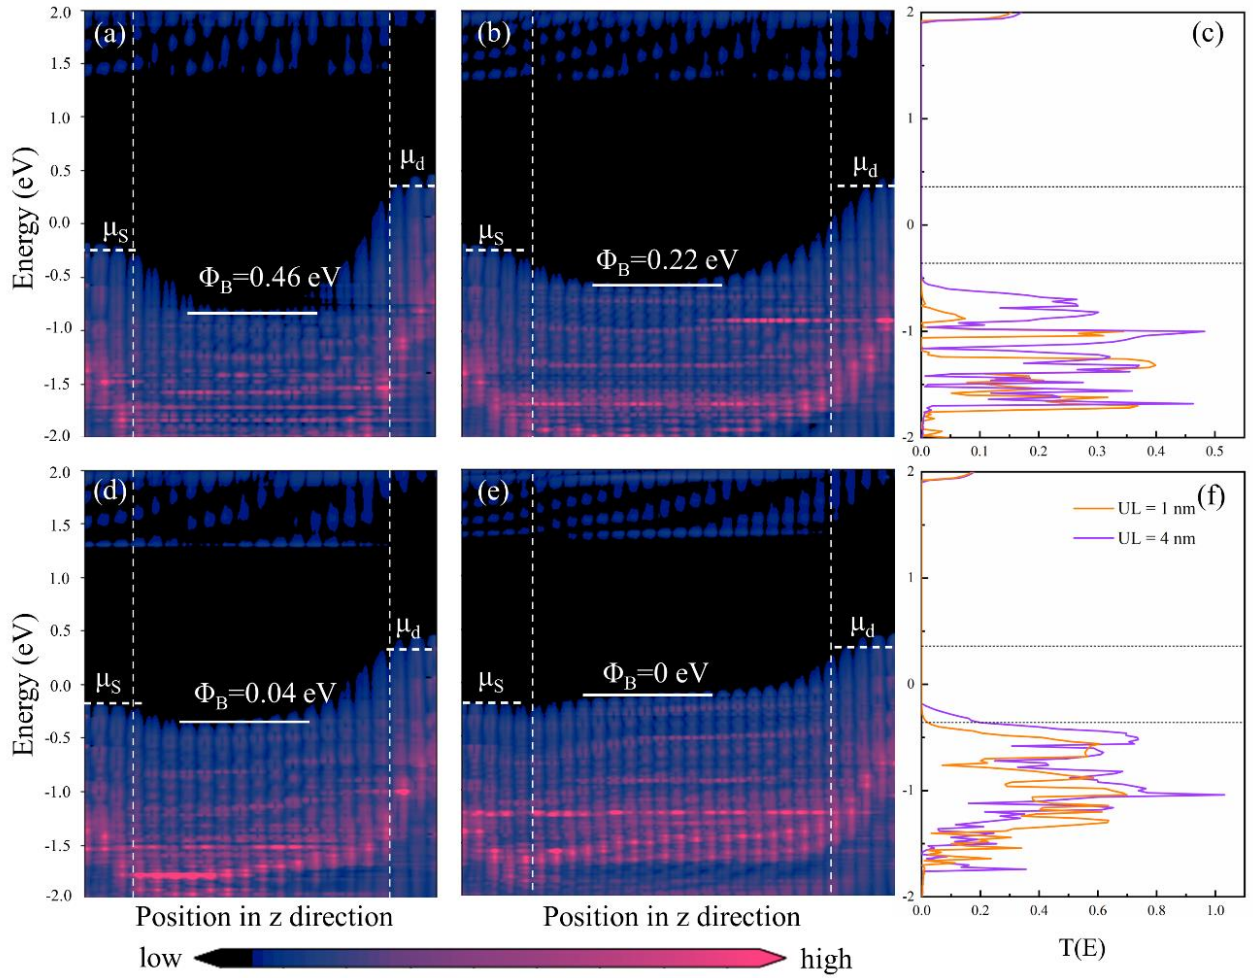

**Figure S2.** PLDOS and transmission spectra of p-type ML InAsH<sub>2</sub> MOSFETs with 5.0 nm-L<sub>g</sub> at (a-c) off state and (d-e) on state.

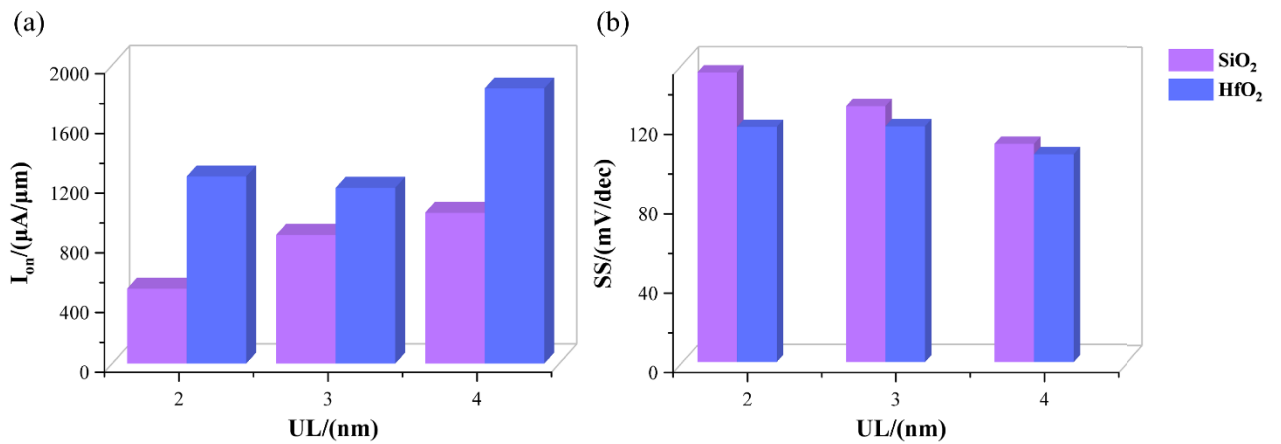

**Figure S3.** I<sub>on</sub> (a) and SS (b) of p-ML InAsH<sub>2</sub> MOSFETs with different ULs and dielectric layers.

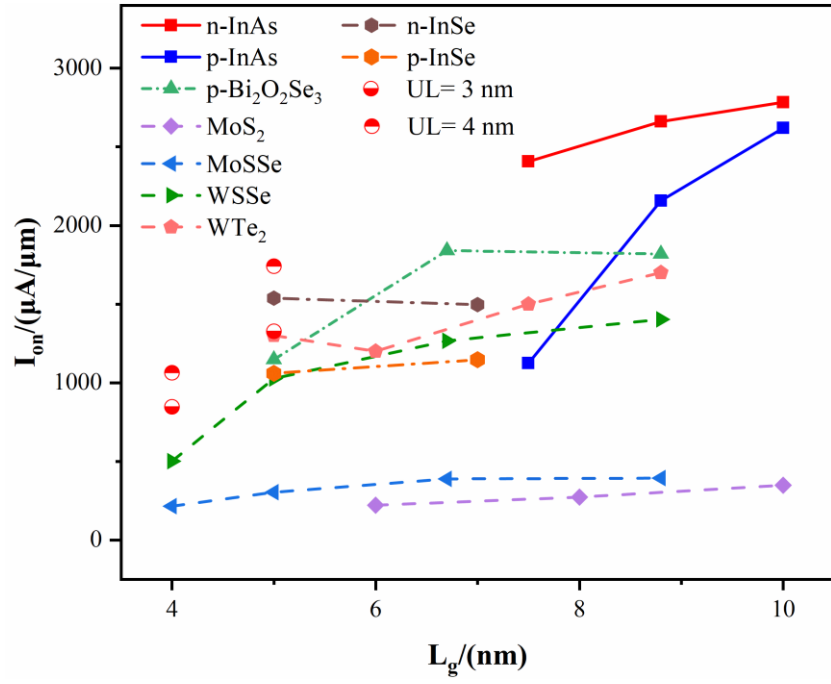

**Figure S4.** Comparison of  $I_{on}$  for n- and p-type ML InAsH<sub>2</sub>(this work), p-type Bi<sub>2</sub>O<sub>2</sub>Se<sub>3</sub>, MoS<sub>2</sub>, MoSSe, WSSe, InSe, WTe<sub>2</sub>, MoTe<sub>2</sub> MOSFETs in ITRS HP applications.
